# Supplementary material for: Non-invasive classification of macrophage polarisation by 2P-FLIM and machine learning
Source: eLife journal article supplement (doi:10.7554/elife.77373), 2022-09-26
Supplement: fig3-data1 [file Figure 3 F - Source Data 1.xlsx]

## Sheet: Figure 3 F - Source Data 1
Row_Labels	Sum of tau[1][ns]	Sum of tau[2][ns]	Sum of A_rel[1][]	Sum of A_rel[2][]	Tavg	ORR
M1	2.63	0.3615	0.3268	0.6732	1.103	0.419657
M1	2.65	0.3617	0.3309	0.6691	1.119	0.412647			Donor 1
M1	2.66	0.3606	0.3348	0.6652	1.13	0.406697			Donor 2
M2	2.71	0.3667	0.3305	0.6695	1.141	0.359485			Donor 3
M2	2.69	0.3669	0.3385	0.6615	1.153	0.360589			Donor 4
M2	2.75	0.359	0.3484	0.6516	1.192	0.345759			Donor 5
M1	2.6	0.3597	0.3072	0.6928	1.048	0.455			Donor 6
M1	2.58	0.3513	0.303	0.697	1.027	0.476
M1	2.65	0.3703	0.3166	0.6834	1.092	0.423
M2	2.69	0.396	0.3255	0.6745	1.143	0.271
M2	2.7	0.3703	0.3264	0.6736	1.131	0.397
M2	2.74	0.369	0.3278	0.6722	1.146	0.418
M1	2.56	0.35	0.3041	0.6959	1.022	0.433
M1	2.6	0.3546	0.3029	0.6971	1.035	0.447
M1	2.62	0.3593	0.3057	0.6943	1.05	0.413
M2	2.56	0.3708	0.3132	0.6868	1.056	0.459
M2	2.6	0.37	0.3151	0.6849	1.073	0.446
M2	2.62	0.3652	0.325	0.675	1.098	0.46
M1	2.64	0.3689	0.305	0.695	1.062	0.4
M1	2.69	0.3754	0.3057	0.6943	1.083	0.394
M1	2.69	0.3727	0.3122	0.6878	1.096	0.378
M2	2.8	0.3726	0.3223	0.6777	1.155	0.393
M2	2.7	0.371	0.3298	0.6702	1.139	0.389
M2	2.76	0.3672	0.3324	0.6676	1.163	0.38
M1	2.59	0.347	0.294	0.706	1.00644	0.436
M1	2.59	0.3475	0.3046	0.6954	1.03057	0.403
M1	2.65	0.3575	0.2943	0.7057	1.03218	0.428
M2	2.7	0.3788	0.3155	0.6845	1.11114	0.393
M2	2.69	0.3745	0.3197	0.6803	1.11477	0.394
M2	2.73	0.382	0.3216	0.6784	1.13712	0.38
M1	2.62	0.3617	0.3235	0.6765	1.092	0.352
M1	2.68	0.366	0.3271	0.6729	1.123	0.334
M1	2.67	0.36	0.3315	0.6685	1.126	0.348
M2	2.7	0.3641	0.3444	0.6556	1.169	0.382
M2	2.75	0.3814	0.3445	0.6555	1.197	0.389
M2	2.7	0.372	0.3469	0.6531	1.18	0.383
